# Supplementary material for: Adsorption of poly acrylic acid onto the surface of calcite: an experimental and simulation study
Source: Royal Society of Chemistry journal article supplement (doi:10.1039/c5cp00945f), 2015-01-01
Supplement: c5cp00945f1.pdf [file c5cp00945f1.pdf]

# Adsorption of Poly Acrylic Acid onto the Surface of Calcite: an Experimental and Simulation Study.

## Supplementary Information

David J. Sparks, Maria E. Romero-Gonzalez, Elfateh El-Taboni,  
Colin L. Freeman, Shaun A. Hall, Gabriella Kakonyi, Linda Swanson,  
Steve A. Banwart, and John H. Harding

February 13, 2015

Here the potential parameters for the poly acrylic acid polymer are given. Table 1 gives an overview of the atomic symbols used throughout the work and the atomic charges. Table 2 gives an overview of the bonds and angles used within this work, with the functional forms for the bonds and angles detailed in Equations 1 and 2 respectively. The dihedral angles of the polymer are given in Table 3 and are of the form in Equation 3. The intermolecular terms between the polymer and the mineral/water are of the AB 12-6 and Buckingham functional forms (Equations 4 & 5) and are presented in Tables 4 & 5.

Table 1: Atom types and atomic charges used in this work

| PAA    |             |                           | CaCO <sub>3</sub> & water |             |                         |
|--------|-------------|---------------------------|---------------------------|-------------|-------------------------|
| Symbol | Charge (au) | PAA atom type             | Symbol                    | Charge (au) | Other atom type         |
| C1     | -0.0737     | terminal carbon           | CA                        | 2.0000      | calcium ion             |
| C1     | -0.0409     | CH2 carbon                | C                         | 1.1233      | carbon of carbonate ion |
| C1     | -0.1477     | CHCOO- backbone carbon    | O                         | -1.0411     | oxygen of carbonate ion |
| CC     | 0.9150      | carboxyl carbon           | OW                        | -0.8340     | oxygen of water         |
| OC     | -0.9130     | carbonyl oxygen           | HW                        | 0.4170      | hydrogen of water       |
| H1     | 0.0171      | Hydrogen of CT carbon     |                           |             |                         |
| H1     | 0.0262      | Hydrogen of CH2 carbon    |                           |             |                         |
| H1     | 0.0528      | Hydrogen of CHCOO- carbon |                           |             |                         |

$$U(r) = \frac{1}{2}k(r - r_0)^2 \quad (1)$$

$$U(\theta) = \frac{k}{2}(\theta - \theta_0)^2 \quad (2)$$

$$U(\phi) = A[1 + \cos(m\phi - \delta)] \quad (3)$$

$$U(r) = \left(\frac{A}{r^{12}}\right) - \left(\frac{B}{r^6}\right) \quad (4)$$

$$U(r) = A \exp\left(-\frac{r}{\rho}\right) - \frac{C}{r^6} \quad (5)$$

Table 2: PAA intramolecular terms - bonds and angles

| <b>Bonds</b> |                                             |           | <b>Angles</b> |                                               |                  |
|--------------|---------------------------------------------|-----------|---------------|-----------------------------------------------|------------------|
| Bond         | $k$ (kJ mol <sup>-1</sup> Å <sup>-2</sup> ) | $r_0$ (Å) | Angle         | $k$ (kJ mol <sup>-1</sup> rad <sup>-2</sup> ) | $\theta_0$ (deg) |
| C1 C1        | 2538.0381                                   | 1.5350    | C1 C1 H1      | 388.2838                                      | 110.056          |
| C1 CC        | 2749.0528                                   | 1.5080    | C1 CC H1      | 395.2339                                      | 109.680          |
| CC OC        | 5426.0928                                   | 1.2140    | OC CC OC      | 654.5643                                      | 130.380          |
| CC H1        | 2824.4152                                   | 1.0920    | H1 C1 H1      | 330.1710                                      | 108.350          |
|              |                                             |           | OC CC C1      | 569.6560                                      | 123.110          |
|              |                                             |           | CC C1 C1      | 534.1519                                      | 110.530          |
|              |                                             |           | C1 C1 C1      | 529.2952                                      | 110.630          |

Table 3: PAA intramolecular terms - dihedrals

| Dihedral    | $A$ (kJ mol <sup>-1</sup> ) | $m$ | $\delta_a$ (deg) | Dihedral    | $A$ (kJ mol <sup>-1</sup> ) | $m$ | $\delta$ (deg) |
|-------------|-----------------------------|-----|------------------|-------------|-----------------------------|-----|----------------|
| C1 C1 C1 H1 | 0.6698                      | 3   | 0                | H1 C1 C1 H1 | 0.6280                      | 3   | 0              |
| CC C1 C1 H1 | 0.6512                      | 3   | 0                | C1 C1 C1 C1 | 0.7536                      | 3   | 0              |
| H1 C1 CC OC | 3.3494                      | 1   | 0                | C1 C1 CC OC | 0.8373                      | 3   | 180            |
| H1 C1 CC OC | 0.3349                      | 3   | 180              | C1 C1 C1 CC | 0.6512                      | 3   | 0              |

Table 4: Intermolecular terms - 12-6

|       | $A$ (kJ mol <sup>-1</sup> Å <sup>-12</sup> ) | $B$ (kJ mol <sup>-1</sup> Å <sup>-6</sup> ) |       | $A$ (kJ mol <sup>-1</sup> Å <sup>-12</sup> ) | $B$ (kJ mol <sup>-1</sup> Å <sup>-6</sup> ) |
|-------|----------------------------------------------|---------------------------------------------|-------|----------------------------------------------|---------------------------------------------|
| C1 C1 | 4367168.3069                                 | 2828.6533                                   | H1 H1 | 31468.3113                                   | 90.9615                                     |
| C1 CC | 3872045.8800                                 | 2507.9582                                   | C1 OW | 3290574.2908                                 | 2664.06319                                  |
| C1 O  | 2712383.7593                                 | 2623.9516                                   | CC OW | 2917509.4066                                 | 2362.0282                                   |
| C1 H1 | 406834.7544                                  | 531.3850                                    | OC OW | 1979952.4366                                 | 2432.6108                                   |
| CC CC | 3433057.3544                                 | 2223.6214                                   | H1 OW | 289587.4783                                  | 486.5014                                    |
| CC OC | 2404870.5299                                 | 2326.4642                                   | C1 O  | 55486.4674                                   | 183.3127                                    |
| CC H1 | 360710.3555                                  | 471.1399                                    | CC O  | 49195.7562                                   | 162.5298                                    |
| OC OC | 1590466.5073                                 | 2365.0646                                   | OC O  | 26516.9115                                   | 149.1753                                    |
| OC H1 | 227871.2130                                  | 468.1074                                    | H1 O  | 3217.3484                                    | 27.1727                                     |

Table 5: Intermolecular terms - Buckingham

|       | $A$ (kJ mol <sup>-1</sup> ) | $\rho$ (Å) | $C$ (kJ mol <sup>-1</sup> Å <sup>-6</sup> ) |
|-------|-----------------------------|------------|---------------------------------------------|
| CA OC | 104684.0984                 | 0.2970     | 0.0                                         |
| OC OW | 48241.6996                  | 0.2300     | 0.0                                         |
